# Supplementary material
Source: PubMed Central journal article supplement (PMC11485208)
Supplement: 41591_2024_3134_MOESM1_ESM.pdf [file 41591_2024_3134_MOESM1_ESM.pdf]

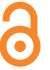

---

# Extension of efficacy range for targeted malaria-elimination interventions due to spillover effects

---

In the format provided by the authors and unedited

---

**Supporting Information to “Extension of efficacy range for targeted malaria elimination interventions due to spill-over effects”**

Supplementary Table 1. Two-by-two factorial study design of reactive focal interventions . 2

Supplementary Table 2. Baseline characteristics in study clusters and analytic cohorts .... 3

Supplementary Table 3. Baseline characteristics among intervention recipients and non-recipients. .... 4

Supplementary Table 4. Direct effect, spillover effect, and total effect estimates on cumulative incidence of malaria infection ..... 5

Supplementary Table 5. Range above and below median value in each enumeration area for subgroup variables ..... 6

Supplementary Table 6. Number of individuals and cohorts included in sensitivity analyses ..... 7

Supplementary Table 7. Percentage of cohorts overlapping with other cohorts ..... 8

Supplementary Table 8. Direct effect, spillover effect, and total effect estimates on malaria prevalence measured by qPCR ..... 9

Supplementary Table 9. Direct effect, spillover effect, and total effect estimates on household-level malaria prevalence of measured by qPCR ..... 10

Supplementary Table 10. Direct effect, spillover effect, and total effect estimates on Etramp5.Ag1 seroprevalence ..... 11

Supplementary Table 11. Cost-effectiveness analysis..... 12

|                             |                                                   | Chemoprevention intervention                                                                           |                                                                                                                         |
|-----------------------------|---------------------------------------------------|--------------------------------------------------------------------------------------------------------|-------------------------------------------------------------------------------------------------------------------------|
|                             |                                                   | Reactive case detection only<br>(28 clusters)                                                          | Reactive focal mass drug administration<br>(28 clusters)                                                                |
| Vector control intervention | No reactive focal vector control<br>(28 clusters) | A. Reactive case detection only<br><b>(RACD)</b><br>(14 clusters)                                      | B. Reactive focal mass drug administration only<br><b>(rfMDA)</b><br>(14 clusters)                                      |
|                             | Reactive focal vector control<br>(28 clusters)    | C. Reactive case detection plus reactive focal vector control<br><b>(RACD + RAVC)</b><br>(14 clusters) | D. Reactive focal mass drug administration plus reactive focal vector control<br><b>(rfMDA + RAVC)</b><br>(14 clusters) |

**Supplementary Table 1. Two-by-two factorial study design of reactive focal interventions**

Reactive case detection (RACD) involved administering rapid diagnostic tests for malaria to individuals living within a 500-m radius of an index case and treating individuals who tested positive with artemether-lumefantrine and single-dose primaquine. Reactive focal mass drug administration (rfMDA) involved presumptively treating individuals living within a 500-m radius of an index case with artemether-lumefantrine, without testing for malaria beforehand. Reactive focal vector control (RAVC) involved spraying the long-lasting insecticide, pirimiphos-methyl, to the interior walls of households located within a seven-household radius of an index case. The effectiveness of three interventions were compared to three respective controls: (1) rfMDA versus RACD (B and D vs A and C); (2) RAVC versus no RAVC (C and D vs A and B); and (3) rfMDA plus RAVC versus a RACD only (D vs A). Reproduced from Hsiang et al. 2020 *Lancet* with permission.

|                                                         | Study Clusters    |                   | Analytic Cohorts  |                   |
|---------------------------------------------------------|-------------------|-------------------|-------------------|-------------------|
| <b>Chemoprevention intervention</b>                     | <b>RACD</b>       | <b>rfMDA</b>      | <b>RACD</b>       | <b>rfMDA</b>      |
| <b>Population characteristics</b>                       |                   |                   |                   |                   |
| Mean cluster/cohort population size (SE)                | 360 (24)          | 318 (22)          | 264 (9)           | 259 (12)          |
| Malaria incidence per 1,000 in 2016 (SE)                | 28.5 (5.8)        | 36.5 (12.5)       | 29.0 (0.11)       | 42.6 (0.34)       |
| Pre-season indoor residual spray coverage 2016 (SE)     | 77.22 (4.03)      | 76.55 (4.58)      | 77.0 (0.10)       | 80.6 (0.11)       |
| Distance to nearest healthcare facility (km) (SE)       | 5.6 (0.8)         | 6.2 (1.0)         | 4.9 (0.02)        | 6.7 (0.03)        |
| <b>Ecological factors (range)</b>                       |                   |                   |                   |                   |
| Median monthly rainfall November 2016-April 2017 (mm)   | 23.7 (18.4, 26.7) | 23.3 (18.4, 26.7) | 23.7 (18.4, 26.7) | 23.5 (18.4, 26.7) |
| Median enhanced vegetative index January 2017-July 2017 | 0.15 (0.09, 0.31) | 0.15 (0.09, 0.27) | 0.15 (0.09, 0.31) | 0.15 (0.09, 0.27) |
| Median elevation (m)                                    | 522 (387, 1021)   | 560 (412, 1124)   | 522 (387, 1021)   | 535 (412, 1124)   |
| Median daytime land surface temperature (C)             | 30.6 (28.9, 33.4) | 31.4 (28.6, 32.5) | 30.5 (28.9, 33.4) | 31.1 (28.6, 32.5) |
| <b>Vector control intervention</b>                      | <b>No RAVC</b>    | <b>RAVC</b>       | <b>No RAVC</b>    | <b>RAVC</b>       |
| <b>Population characteristics</b>                       |                   |                   |                   |                   |
| Mean cluster/cohort population size (SE)                | 339 (22)          | 338 (24)          | 249 (9)           | 274 (11)          |
| Malaria incidence per 1,000 in 2016 (SE)                | 26.1 (6.4)        | 38.9 (12.1)       | 28.7 (0.16)       | 41.4 (0.29)       |
| Pre-season indoor residual spray coverage 2016 (SE)     | 77.98 (4.64)      | 75.82 (3.99)      | 78.6 (0.11)       | 78.8 (0.09)       |
| Distance to nearest healthcare facility (km) (SE)       | 4.9 (0.8)         | 6.8 (0.9)         | 4.4 (0.02)        | 6.9 (0.02)        |
| <b>Ecological factors (range)</b>                       |                   |                   |                   |                   |
| Median monthly rainfall November 2016-April 2017 (mm)   | 23.5 (18.4, 26.7) | 23.7 (18.4, 26.7) | 23.7 (18.4, 26.7) | 23.7 (18.4, 26.7) |
| Median enhanced vegetative index January 2017-July 2017 | 0.15 (0.09, 0.22) | 0.15 (0.09, 0.31) | 0.15 (0.09, 0.22) | 0.15 (0.09, 0.31) |
| Median elevation (m)                                    | 535 (398, 1124)   | 544 (387, 1021)   | 527 (398, 1124)   | 547 (387, 1021)   |
| Median daytime land surface temperature (C)             | 31.1 (28.6, 33.4) | 31.1 (28.7, 32.5) | 30.7 (28.6, 33.4) | 30.8 (28.7, 32.5) |
| <b>Combined intervention</b>                            | <b>RACD only</b>  | <b>rfMDA+RAVC</b> | <b>RACD only</b>  | <b>rfMDA+RAVC</b> |
| <b>Population characteristics</b>                       |                   |                   |                   |                   |
| Mean cluster/cohort population size (SE)                | 350 (25)          | 308 (26)          | 282 (13)          | 305 (19)          |
| Malaria incidence per 1,000 in 2016 (SE)                | 27.3 (8.1)        | 48.1 (22.9)       | 27.3 (0.16)       | 52.4 (0.55)       |
| Pre-season indoor residual spray coverage 2016 (SE)     | 84.25 (5.66)      | 80.93 (5.82)      | 82.9 (0.13)       | 86.4 (0.12)       |
| Distance to nearest healthcare facility (km) (SE)       | 3.9 (0.8)         | 6.6 (1.5)         | 3.2 (0.02)        | 7.3 (0.04)        |
| <b>Ecological factors (range)</b>                       |                   |                   |                   |                   |
| Median monthly rainfall November 2016-April 2017 (mm)   | 23.7 (18.4, 26.7) | 23.4 (18.4, 26.7) | 23.7 (18.4, 26.7) | 23.7 (18.4, 26.7) |
| Median enhanced vegetative index January 2017-July 2017 | 0.15 (0.10, 0.21) | 0.15 (0.09, 0.27) | 0.15 (0.10, 0.21) | 0.15 (0.09, 0.27) |
| Median elevation (m)                                    | 522 (398, 921)    | 558 (412, 984)    | 522 (398, 921)    | 576 (412, 984)    |
| Median daytime land surface temperature (C)             | 30.7 (28.9, 33.4) | 31.4 (28.7, 32.5) | 30.6 (28.9, 33.4) | 31.1 (28.7, 32.5) |

### Supplementary Table 2. Baseline characteristics in study clusters and analytic cohorts

Includes 55 study clusters that were randomized in the original trial and had at least one index case during follow-up and 310 analytic cohorts used in the analysis of spillover effects and direct effects.

|                                                         | Intervention recipients |                   | Non-recipients    |                   |
|---------------------------------------------------------|-------------------------|-------------------|-------------------|-------------------|
| <b>Chemoprevention intervention</b>                     | <b>RACD</b>             | <b>rfMDA</b>      | <b>RACD</b>       | <b>rfMDA</b>      |
| <b>Population characteristics</b>                       |                         |                   |                   |                   |
| Number of cohorts                                       | 161                     | 149               | 161               | 149               |
| Mean cohort population size (SE)                        | 26 (1)                  | 27 (1)            | 238 (9)           | 232 (12)          |
| Mean cluster population size (SE)                       | 389.6 (1.94)            | 346.4 (1.96)      | 379.4 (0.63)      | 355.8 (0.59)      |
| Malaria incidence per 1,000 in 2016 (SE)                | 27.0 (0.37)             | 55.8 (1.26)       | 29.2 (0.12)       | 41.0 (0.35)       |
| Pre-season indoor residual spray coverage 2016 (SE)     | 76.3 (0.32)             | 77.1 (0.36)       | 77.1 (0.10)       | 81.0 (0.12)       |
| Distance to nearest healthcare facility (km) (SE)       | 5.2 (0.06)              | 6.7 (0.08)        | 4.9 (0.02)        | 6.7 (0.03)        |
| <b>Ecological factors (range)</b>                       |                         |                   |                   |                   |
| Median monthly rainfall November 2016-April 2017 (mm)   | 23.7 (18.4, 26.7)       | 23.5 (18.4, 26.7) | 23.7 (18.4, 26.7) | 23.5 (18.4, 26.7) |
| Median enhanced vegetative index January 2017-July 2017 | 0.15 (0.09, 0.31)       | 0.15 (0.09, 0.27) | 0.15 (0.09, 0.31) | 0.15 (0.09, 0.27) |
| Median elevation (m)                                    | 522 (387, 1021)         | 541 (412, 1124)   | 522 (387, 1021)   | 535 (412, 1124)   |
| Median daytime land surface temperature (C)             | 30.5 (28.9, 33.4)       | 31.1 (28.6, 32.5) | 30.5 (28.9, 33.4) | 31.1 (28.6, 32.5) |
| <b>Vector control intervention</b>                      | <b>No RAVC</b>          | <b>RAVC</b>       | <b>No RAVC</b>    | <b>RAVC</b>       |
| <b>Population characteristics</b>                       |                         |                   |                   |                   |
| Number of cohorts                                       | 152                     | 158               | 152               | 158               |
| Mean cohort population size (SE)                        | 26 (1)                  | 27 (1)            | 223 (9)           | 247 (11)          |
| Mean cluster population size (SE)                       | 358.9 (2.01)            | 376.9 (1.94)      | 354.0 (0.58)      | 380.5 (0.63)      |
| Malaria incidence per 1,000 in 2016 (SE)                | 31.9 (0.60)             | 50.0 (1.15)       | 28.3 (0.17)       | 40.4 (0.29)       |
| Pre-season indoor residual spray coverage 2016 (SE)     | 77.9 (0.37)             | 75.6 (0.31)       | 78.6 (0.12)       | 79.2 (0.10)       |
| Distance to nearest healthcare facility (km) (SE)       | 5.0 (0.06)              | 6.7 (0.07)        | 4.4 (0.02)        | 6.9 (0.02)        |
| <b>Ecological factors (range)</b>                       |                         |                   |                   |                   |
| Median monthly rainfall November 2016-April 2017 (mm)   | 23.5 (18.4, 26.7)       | 23.7 (18.4, 26.7) | 23.7 (18.4, 26.7) | 23.7 (18.4, 26.7) |
| Median enhanced vegetative index January 2017-July 2017 | 0.15 (0.09, 0.22)       | 0.15 (0.09, 0.31) | 0.15 (0.09, 0.22) | 0.15 (0.09, 0.31) |
| Median elevation (m)                                    | 527 (398, 1124)         | 547 (387, 1021)   | 527 (398, 1124)   | 547 (387, 1021)   |
| Median daytime land surface temperature (C)             | 30.7 (28.6, 33.4)       | 30.8 (28.7, 32.5) | 30.7 (28.6, 33.4) | 30.8 (28.7, 32.5) |
| <b>Combined intervention</b>                            | <b>RACD only</b>        | <b>rfMDA+RAVC</b> | <b>RACD only</b>  | <b>rfMDA+RAVC</b> |
| <b>Population characteristics</b>                       |                         |                   |                   |                   |
| Number of cohorts                                       | 73                      | 70                | 73                | 70                |
| Mean cohort population size (SE)                        | 26 (1)                  | 29 (1)            | 256 (13)          | 276 (19)          |
| Mean cluster population size (SE)                       | 353.0 (2.05)            | 328.0 (1.89)      | 349.5 (0.61)      | 352.8 (0.63)      |
| Malaria incidence per 1,000 in 2016 (SE)                | 26.6 (0.56)             | 75.4 (2.25)       | 27.3 (0.16)       | 50.0 (0.55)       |
| Pre-season indoor residual spray coverage 2016 (SE)     | 83.6 (0.43)             | 81.5 (0.42)       | 82.8 (0.14)       | 86.9 (0.12)       |
| Distance to nearest healthcare facility (km) (SE)       | 3.5 (0.06)              | 6.9 (0.12)        | 3.2 (0.02)        | 7.3 (0.04)        |
| <b>Ecological factors (range)</b>                       |                         |                   |                   |                   |
| Median monthly rainfall November 2016-April 2017 (mm)   | 23.7 (18.4, 26.7)       | 23.7 (18.4, 26.7) | 23.7 (18.4, 26.7) | 23.7 (18.4, 26.7) |
| Median enhanced vegetative index January 2017-July 2017 | 0.15 (0.10, 0.21)       | 0.15 (0.09, 0.27) | 0.15 (0.10, 0.21) | 0.15 (0.09, 0.27) |
| Median elevation (m)                                    | 522 (398, 921)          | 576 (412, 984)    | 522 (398, 921)    | 677 (412, 984)    |
| Median daytime land surface temperature (C)             | 30.7 (28.9, 33.4)       | 31.1 (28.7, 32.5) | 30.6 (28.9, 33.4) | 31.1 (28.7, 32.5) |

**Supplementary Table 3. Baseline characteristics among intervention recipients and non-recipients.**

Includes data from intervention recipients in target areas located within 500m of an index case and non-recipients up to 1km from an index case that triggered interventions.

|                                                           | N cohorts | N      | Incidence proportion |               | Incidence ratio (95% CI) |                   |                                          |
|-----------------------------------------------------------|-----------|--------|----------------------|---------------|--------------------------|-------------------|------------------------------------------|
|                                                           |           |        | Intervention arm     | Reference arm | Unadjusted               | Adjusted          | Adjusted, CI adjusted for cohort overlap |
| <b>Chemoprevention intervention (rfMDA vs. RACD)</b>      |           |        |                      |               |                          |                   |                                          |
| Direct effect                                             | 310       | 8,252  | 3.4                  | 6.5           | 0.53 (0.25, 1.11)        | 0.40 (0.11, 1.48) | 0.40 (0.10, 1.56)                        |
| Spillover effect                                          | 310       | 72,830 | 9.0                  | 9.9           | 0.91 (0.60, 1.37)        | 0.82 (0.52, 1.29) | 0.82 (0.44, 1.51)                        |
| Total effect                                              | 310       | 81,082 | 8.4                  | 9.6           | 0.88 (0.59, 1.31)        | 0.83 (0.51, 1.35) | 0.83 (0.43, 1.60)                        |
| <b>Vector control intervention (RAVC vs. no RAVC)</b>     |           |        |                      |               |                          |                   |                                          |
| Direct effect                                             | 310       | 8,252  | 8.9                  | 7.6           | 1.17 (0.62, 2.23)        | 1.35 (0.54, 3.34) | 1.35 (0.43, 4.25)                        |
| Spillover effect                                          | 310       | 72,830 | 12.9                 | 18.5          | 0.69 (0.47, 1.03)        | 0.68 (0.46, 1.00) | 0.68 (0.36, 1.30)                        |
| Total effect                                              | 310       | 81,082 | 12.5                 | 17.4          | 0.72 (0.49, 1.06)        | 0.75 (0.48, 1.20) | 0.75 (0.33, 1.70)                        |
| <b>Combined intervention (rfMDA + RAVC vs. RACD only)</b> |           |        |                      |               |                          |                   |                                          |
| Direct effect                                             | 143       | 3,914  | 6.4                  | 7.4           | 0.87 (0.32, 2.41)        | 1.03 (0.22, 4.81) | 1.03 (0.19, 5.58)                        |
| Spillover effect                                          | 143       | 38,048 | 11.2                 | 18.1          | 0.62 (0.34, 1.13)        | 0.57 (0.41, 0.80) | 0.57 (0.42, 0.79)                        |
| Total effect                                              | 143       | 41,962 | 10.8                 | 17.1          | 0.63 (0.35, 1.12)        | 0.37 (0.22, 0.63) | 0.37 (0.18, 0.79)                        |

**Supplementary Table 4. Direct effect, spillover effect, and total effect estimates on cumulative incidence of malaria infection**

For rfMDA and RACD arms, the analysis includes the period from 0-35 days following index case detection for direct effects and 21-56 days for spillover effects. For rfMDA+RAVC and RAVC only arms, the analysis includes the period from 0-6 months following index case detection for direct effects and 17 days to 6 months for spillover effects. Total effects analyses include the person-time for the direct effects and spillover effects analyses. Direct effect includes intervention recipients in the target zone. Spillover effect analyses includes intervention non-recipients up to 1km from an index case. Total effect includes all individuals (intervention recipients and non-recipients) up to 1km from index case. Models were fit with hierarchical targeted maximum likelihood. All outcome models were fit with cohort-level data except for models of spillover effects of rfMDA + RAVC vs. RACD only. Covariates were screened separately for each model using a likelihood ratio test. We separately fit individual- and cohort-level outcome models and report the model with the smaller cross-validated mean squared error. All models except spillover effects of the chemoprevention and combined interventions were fit on cohort-level data.

|                                                         | Below median |         | Above median |         |
|---------------------------------------------------------|--------------|---------|--------------|---------|
|                                                         | Minimum      | Maximum | Minimum      | Maximum |
| Malaria incidence per 1,000 in 2016                     | 0.0          | 13.9    | 14.9         | 293.3   |
| Pre-season indoor residual spray coverage 2016 (%)      | 27.2         | 77.3    | 77.9         | 100     |
| Median daytime land surface temperature (C)             | 28.6         | 31.1    | 31.1         | 33.4    |
| Median monthly rainfall November 2016-April 2017 (mm)   | 18.4         | 23.7    | 23.7         | 26.7    |
| Median enhanced vegetative index January 2017-July 2017 | 0.09         | 0.15    | 0.15         | 0.31    |
| Median elevation (m)                                    | 387          | 541     | 544          | 1124    |
| Cohort-level treatment coverage (%)                     | 0.0          | 8.3     | 8.3          | 97.4    |

**Supplementary Table 5. Range above and below median value in each enumeration area for subgroup variables**

| Sensitivity analysis    | Intervention    | N individuals |                  |              | N cohorts     |                  |              |
|-------------------------|-----------------|---------------|------------------|--------------|---------------|------------------|--------------|
|                         |                 | Direct effect | Spillover effect | Total effect | Direct effect | Spillover effect | Total effect |
| Primary analysis        | Chemoprevention | 8252          | 72830            | 81082        | 310           | 310              | 310          |
|                         | Vector control  | 8252          | 72830            | 81082        | 310           | 310              | 310          |
|                         | Combined        | 3914          | 38048            | 41962        | 143           | 143              | 143          |
| Alternative observation | Chemoprevention | 8252          | 72830            | 81082        | 310           | 310              | 310          |
|                         | Vector control  | 8252          | 72830            | 81082        | 310           | 310              | 310          |
|                         | Combined        | 3914          | 38048            | 41962        | 143           | 143              | 143          |
| No overlap spillover    | Chemoprevention | 4728          | 42141            | 46869        | 182           | 182              | 182          |
|                         | Vector control  | 6080          | 56159            | 62239        | 235           | 235              | 235          |
|                         | Combined        | 2917          | 27973            | 30890        | 107           | 107              | 107          |
| No overlap target       | Chemoprevention | 5875          | 57600            | 63475        | 222           | 222              | 222          |
|                         | Vector control  | 7898          | 72056            | 79954        | 292           | 292              | 292          |
|                         | Combined        | 3769          | 37725            | 41494        | 135           | 135              | 135          |

**Supplementary Table 6. Number of individuals and cohorts included in sensitivity analyses**



|                                                              | Primary analysis |                | Sensitivity analysis with shorter observation period |                |
|--------------------------------------------------------------|------------------|----------------|------------------------------------------------------|----------------|
|                                                              | Target areas     | Spillover zone | Target areas                                         | Spillover zone |
| <b>Chemoprevention intervention</b><br>(rfMDA vs. RACD)      | 32.0             | 28.9           | 21.0                                                 | 17.4           |
| <b>Vector control intervention</b><br>(RAVC vs. no RAVC)     | 59.2             | 47.5           | 52.5                                                 | 41.2           |
| <b>Combined intervention</b><br>(rfMDA + RAVC vs. RACD only) | 60.5             | 28.1           | 57.8                                                 | 24.5           |

**Supplementary Table 7. Percentage of cohorts overlapping with other cohorts**

Overlap in target area was defined as index cases that triggered interventions located within <1km of each other and observation periods that temporally overlapped with another cohort's. Overlap in spillover zones was defined as index cases that triggered interventions located within 1-2km of each other and observation periods that temporally overlapped with another cohort's. The denominator was the total cohorts included in each analysis.

|                                                              | N                |               | Prevalence       |               | Prevalence ratio (95% CI) |                   |
|--------------------------------------------------------------|------------------|---------------|------------------|---------------|---------------------------|-------------------|
|                                                              | Intervention arm | Reference arm | Intervention arm | Reference arm | Unadjusted                | Adjusted          |
| <b>Chemoprevention intervention</b><br>(rfMDA vs. RACD)      |                  |               |                  |               |                           |                   |
| Direct effect                                                | 1537             | 1835          | 0.029            | 0.033         | 0.90 (0.61, 1.31)         | 0.84 (0.53, 1.32) |
| Spillover effect                                             | 244              | 229           | 0.025            | 0.087         | 0.28 (0.12, 0.69)         | --                |
| Total effect                                                 | 1781             | 2064          | 0.029            | 0.039         | 0.74 (0.52, 1.04)         | 0.79 (0.51, 1.19) |
|                                                              |                  |               |                  |               |                           |                   |
| <b>Vector control intervention</b><br>(RAVC vs. no RAVC)     |                  |               |                  |               |                           |                   |
| Direct effect                                                | 1710             | 1662          | 0.026            | 0.037         | 0.70 (0.48, 1.03)         | 0.78 (0.51, 1.21) |
| Spillover effect                                             | 195              | 278           | 0.051            | 0.058         | 0.89 (0.41, 1.92)         | --                |
| Total effect                                                 | 1905             | 1940          | 0.028            | 0.040         | 0.71 (0.51, 1.01)         | 0.64 (0.43, 0.96) |
|                                                              |                  |               |                  |               |                           |                   |
| <b>Combined intervention</b><br>(rfMDA + RAVC vs. RACD only) |                  |               |                  |               |                           |                   |
| Direct effect                                                | 758              | 883           | 0.017            | 0.033         | 0.52 (0.27, 1.00)         | --                |
| Spillover effect                                             | 118              | 152           | 0.017            | 0.079         | 0.21 (0.05, 0.94)         | --                |
| Total effect                                                 | 876              | 1035          | 0.017            | 0.040         | 0.43 (0.24, 0.78)         | --                |

**Supplementary Table 8. Direct effect, spillover effect, and total effect estimates on malaria prevalence measured by qPCR**

Prevalence was measured in a cross-sectional survey in a random sample of households at the end of the malaria season. Analyses were restricted to individuals located within 3 km of at least one intervention recipient. Direct effects include individuals with any intervention recipients within 500m, spillover effects include individuals with no intervention recipients < 500m and any intervention recipients 500m-3km, and total effects include individuals with any intervention recipients <3km during the study. Prevalence ratios were estimated using TMLE with individual-level data, and standard errors were adjusted for clustering at the enumeration area level. Adjusted models were not fit if there were fewer than 30 observations within strata of the intervention and outcome.

|                                                              | N households     |                  | Prevalence          |                  | Unadjusted<br>Prevalence Ratio<br>(95% CI) |
|--------------------------------------------------------------|------------------|------------------|---------------------|------------------|--------------------------------------------|
|                                                              | Intervention arm | Reference<br>arm | Intervention<br>arm | Reference<br>arm |                                            |
| <b>Chemoprevention intervention</b><br>(rfMDA vs. RACD)      |                  |                  |                     |                  |                                            |
| Direct effect                                                | 456              | 506              | 0.018               | 0.018            | 0.99 (0.38, 2.54)                          |
| Spillover effect                                             | 72               | 69               | 0.000               | 0.043            | 0.00 (0.00, 0.00)                          |
| Total effect                                                 | 528              | 575              | 0.015               | 0.021            | 0.73 (0.30, 1.76)                          |
|                                                              |                  |                  |                     |                  |                                            |
| <b>Vector control intervention</b><br>(RAVC vs. no RAVC)     |                  |                  |                     |                  |                                            |
| Direct effect                                                | 481              | 481              | 0.012               | 0.023            | 0.55 (0.20, 1.46)                          |
| Spillover effect                                             | 65               | 76               | 0.015               | 0.026            | 0.58 (0.05, 6.35)                          |
| Total effect                                                 | 546              | 557              | 0.013               | 0.023            | 0.55 (0.22, 1.37)                          |
|                                                              |                  |                  |                     |                  |                                            |
| <b>Combined intervention</b><br>(rfMDA + RAVC vs. RACD only) |                  |                  |                     |                  |                                            |
| Direct effect                                                | 219              | 244              | 0.005               | 0.016            | 0.28 (0.03, 2.48)                          |
| Spillover effect                                             | 36               | 40               | 0.000               | 0.050            | 0.00 (0.00, 0.00)                          |
| Total effect                                                 | 255              | 284              | 0.004               | 0.021            | 0.19 (0.02, 1.53)                          |

**Supplementary Table 9. Direct effect, spillover effect, and total effect estimates on household-level malaria prevalence of measured by qPCR**

Prevalence was measured in a cross-sectional survey in a random sample of households at the end of the malaria season. Analyses were run at the household level. Household-level malaria prevalence was the percentage of households with more than one malaria case detected in the prevalence survey by qPCR. Direct effects include households with any intervention recipients within 500m, spillover effects include households with no intervention recipients < 500m and any intervention recipients 500m-3km, and total effects include households with any intervention recipients <3km during the study. Prevalence ratios were estimated using TMLE with household-level data. Adjusted models were not fit because there were fewer than 30 observations within strata of the intervention and outcome.

|                                                           | N                |               | Prevalence       |               | Prevalence ratio (95% CI) |                   |
|-----------------------------------------------------------|------------------|---------------|------------------|---------------|---------------------------|-------------------|
|                                                           | Intervention arm | Reference arm | Intervention arm | Reference arm | Unadjusted                | Adjusted          |
| <b>Chemoprevention intervention (rfMDA vs. RACD)</b>      |                  |               |                  |               |                           |                   |
| Direct effect                                             | 1316             | 1611          | 0.215            | 0.285         | 0.75 (0.66, 0.86)         | 0.84 (0.71, 1.00) |
| Spillover effect                                          | 198              | 182           | 0.227            | 0.225         | 1.01 (0.69, 1.46)         | 1.32 (0.73, 2.41) |
| Total effect                                              | 1514             | 1793          | 0.217            | 0.279         | 0.78 (0.69, 0.88)         | 0.85 (0.73, 0.99) |
|                                                           |                  |               |                  |               |                           |                   |
| <b>Vector control intervention (RAVC vs. no RAVC)</b>     |                  |               |                  |               |                           |                   |
| Direct effect                                             | 1475             | 1452          | 0.241            | 0.267         | 0.90 (0.80, 1.02)         | 0.90 (0.79, 1.04) |
| Spillover effect                                          | 133              | 247           | 0.188            | 0.247         | 0.76 (0.50, 1.15)         | --                |
| Total effect                                              | 1608             | 1699          | 0.236            | 0.264         | 0.90 (0.80, 1.01)         | 0.88 (0.76, 1.01) |
|                                                           |                  |               |                  |               |                           |                   |
| <b>Combined intervention (rfMDA + RAVC vs. RACD only)</b> |                  |               |                  |               |                           |                   |
| Direct effect                                             | 634              | 770           | 0.194            | 0.295         | 0.66 (0.54, 0.80)         | --                |
| Spillover effect                                          | 81               | 130           | 0.136            | 0.208         | 0.66 (0.55, 0.80)         | --                |
| Total effect                                              | 715              | 900           | 0.187            | 0.282         | 0.65 (0.34, 1.25)         | --                |

**Supplementary Table 10. Direct effect, spillover effect, and total effect estimates on Etramp5.Ag1 seroprevalence**

Prevalence was measured in a cross-sectional survey in a random sample of households at the end of the malaria season. Analyses were restricted to individuals located within 3 km of at least one intervention recipient. Direct effects include individuals with any intervention recipients within 500m, spillover effects include individuals with no intervention recipients < 500m and any intervention recipients 500m-3km, and total effects include individuals with any intervention recipients <3km during the study. Prevalence ratios were estimated using TMLE with individual-level data, and standard errors were adjusted for clustering at the enumeration area level. Adjusted models were not fit if there were fewer than 30 observations within strata of the intervention and outcome.

|            | Intervention cost | N individuals | Prevalence | Prevalent cases | Total prevalent cases averted (95% CI) | ICER (95% CI)              | % change in ICER |
|------------|-------------------|---------------|------------|-----------------|----------------------------------------|----------------------------|------------------|
| RACD       | \$354,750         | 9,394         | 0.039      | 364             | (ref)                                  | (ref)                      |                  |
| rfMDA      | \$368,321         | 9,417         | 0.029      | 270             | 94 (89, 100)                           | \$144 (\$136, \$153)       | -11%             |
| No RAVC    | \$261,409         | 9,400         | 0.040      | 373             | (ref)                                  | (ref)                      |                  |
| RAVC       | \$461,661         | 9,407         | 0.028      | 267             | 106 (95, 118)                          | \$1,882 (\$1,679, \$2,111) | -30%             |
| RACD only  | \$127,312         | 4,516         | 0.040      | 179             | (ref)                                  | (ref)                      |                  |
| rfMDA+RAVC | \$234,223         | 4,500         | 0.017      | 77              | 102 (87, 117)                          | \$1,050 (\$915, \$1,231)   | -42%             |

### Supplementary Table 11. Cost-effectiveness analysis

Incremental cost-effectiveness ratios (ICERs) were estimated using prevalent cases averted from hierarchical TMLE models for prevalence measured by qPCR. The number of prevalent cases averted equaled the produce of the difference in prevalence between arms among intervention recipients and non-recipients by the estimated population size within target areas vs. spillover zones. The incremental cost effectiveness ratio is the ratio of the difference in cost between arms by the difference in prevalent cases averted in both target area and spillover zones within 3 km of index cases for rfMDA + RAVC vs. RACD. The % change in ICER compares the ICER accounting for spillover effects to the original trial's ICER estimate reported in Ntuku et al., 2022 10.1136/bmjopen-2021-049050.
